# Supplementary material
Source: Springer Nature journal article supplement (https://www.springermedizin.de/resource/supplementary/12957_2013_1889_MOESM1_ESM.pdf/9563758)
Supplement: MOESM1 [file 9563758]

- Paton VE, Klein P, Lieberman G. Trastuzumab (H) benefits both younger and older women with HER2 positive MBC. Proc Am Soc Clin Oncol 2003; 22: (Abstr 294).
- Fyfe GA, Mass R, Murphy M et al. Survival benefit of trastuzumab (Herceptin) and chemotherapy in older (age >60) patients. Proc Am Soc Clin Oncol 2001; 20: (Abstr 189).
- Serrano C, Cortés J, De Mattos-Arruda L et al. Trastuzumab related cardiotoxicity in the elderly: a role for cardiovascular risk factors. Ann Oncol 2012; 23: 897–902.

doi: 10.1093/annonc/mds596

## Fulvestrant and male breast cancer: a case series

Male breast cancer is an uncommon malignancy, accounting for ~1% of all diagnosed breast cancers [1]. The rarity of these neoplasms has resulted in a relatively limited amount of literature. Unfortunately, clinical-trial reports in men are lacking and conclusions have been drawn from female trials. Consequently, men with breast cancer are treated similarly to women, except for the hormonal treatment [1]. More specifically, tamoxifen is the gold standard in the adjuvant endocrine treatment of male breast cancer and plays a key role in the metastatic setting [1]. However, the role of aromatase inhibitors (AIs) and fulvestrant remains controversial.

Fulvestrant is a synthetic estrogen receptor (ER) antagonist or a selective ER down-regulator. Unlike tamoxifen and the AI, fulvestrant binds competitively to ERs in breast cancer cells, resulting in ER deformation and decreased estrogen binding. In postmenopausal women, fulvestrant has confirmed efficacy in women previously treated with tamoxifen or AIs [2]. However, there have only been limited data regarding the use of fulvestrant in male breast cancer [3, 4]. Its mechanism of

action, along with the available *in vitro* data [5], indicates that this agent may represent a useful treatment option for male breast cancer patients.

In this retrospective chart review, cases with male breast cancer treated with fulvestrant were evaluated. Eligible patients derived from the Department of Medicine I/ Division of Oncology, Vienna, Austria and from the 1st Propaedeutic Surgical Department of Hippocrateio Hospital, University of Athens, Athens, Greece. In all cases, fulvestrant was administered at a loading dose of 500 mg on day 1 followed by 250 mg on day 14 and monthly thereafter, until disease progression. The response was assessed according to the RECIST criteria. Overall survival (OS) was defined as the interval between initial diagnosis and time of death, whereas time to treatment progression (TTP) was defined as the interval between initiation of fulvestrant and time of progression.

Fourteen men aged 53–76 years ( $63.5 \pm 6.8$ , mean  $\pm$  SD) were included in this case series. Patients' characteristics are depicted in Table 1. None of the patients had received chemotherapy treatment for metastatic disease. In the majority of cases, fulvestrant was given as a second-line hormonal treatment in six (42.9%) patients, as a third-line agent in seven (50%) patients and as fourth line in one (7.1%) patient. In all cases, fulvestrant was tolerated well, without grade 3 and 4 adverse events being reported. Regarding the best response, partial response (PR) was noted in three (21.4%) patients, stable disease (SD) in seven (50%) patients, whereas progressive disease (PD) was observed in four (28.6%) patients. The median time to treatment progression (TTP) was equal to 5 months, ranging between 2 and 7 months. The median overall survival (OS) was 61.5 months. The study was approved by local ethics committees. According to our knowledge, this is the largest case series reported in the literature with fulvestrant administration in male breast cancer.

**Table 1.** Patients' characteristics

| Number | Age (years) | Type | Grade | Initial stage at diagnosis | ER-Allred Score | HER2 status | PR status | Ki-67 (%) | Adjuvant hormonal treatment | Adjuvant chemotherapy | Fulvestrant (line) | Best response with fulvestrant | Overall survival (OS) (months) | TTP (months) |
|--------|-------------|------|-------|----------------------------|-----------------|-------------|-----------|-----------|-----------------------------|-----------------------|--------------------|--------------------------------|--------------------------------|--------------|
| 1.     | 68          | IDC  | 3     | IIIC                       | 8               | Neg         | Pos       | 60        | Yes                         | A + T                 | Second             | SD                             | 55                             | 6            |
| 2.     | 65          | IDC  | 3     | IIA                        | 5               | Neg         | Pos       | 45        | Yes                         | A + T                 | Third              | SD                             | 79                             | 5            |
| 3.     | 71          | ILC  | 3     | IIIC                       | 8               | Neg         | Pos       | 30        | Yes                         | A + T                 | Second             | PR                             | 45                             | 4            |
| 4.     | 59          | IDC  | 3     | IIB                        | 8               | Neg         | Pos       | 15        | Yes                         | A + T                 | Third              | SD                             | 61                             | 6            |
| 5.     | 69          | IDC  | 3     | IIA                        | 8               | Neg         | Neg       | 10        | Yes                         | A + T                 | Second             | PR                             | >32                            | 5            |
| 6.     | 58          | IDC  | 2     | IIB                        | 7               | Neg         | Pos       | 55        | Yes                         | A                     | Third              | SD                             | 73                             | 6            |
| 7.     | 59          | IDC  | 2     | IIIC                       | 8               | Pos         | Pos       | 45        | Yes                         | A + T + H             | Fourth             | PD                             | 53                             | 2            |
| 8.     | 54          | IDC  | 3     | IIA                        | 7               | Neg         | Pos       | 20        | Yes                         | A + T                 | Third              | PR                             | >93                            | 4            |
| 9.     | 76          | ILC  | 1     | IIIA                       | 7               | Neg         | Pos       | 15        | Yes                         | T                     | Third              | SD                             | 74                             | 5            |
| 10.    | 53          | IDC  | 2     | IIIA                       | 6               | Neg         | Pos       | 40        | Yes                         | A + T                 | Second             | PD                             | 62                             | 2            |
| 11.    | 64          | IDC  | 3     | IIIC                       | 7               | Neg         | Pos       | 40        | No                          | A + T                 | Third              | PD                             | 83                             | 2            |
| 12.    | 59          | IDC  | 3     | I                          | 8               | Neg         | Pos       | 30        | Yes                         | A                     | Third              | SD                             | 64                             | 7            |
| 13.    | 64          | IDC  | 3     | I                          | 6               | Neg         | Pos       | 20        | Yes                         | None                  | Second             | PD                             | 18                             | 3            |
| 14.    | 70          | IDC  | 2     | IIIA                       | 6               | Neg         | Pos       | N/A       | Yes                         | A                     | Second             | SD                             | 39                             | 7            |

A, Anthracycline-based chemotherapy; T, Taxane-based chemotherapy; H, trastuzumab; PR, partial response; SD, stable disease; PD, progressive disease; TTP, time to treatment progression.

In conclusion, it seems that fulvestrant is an effective and safe treatment of hormone receptor-positive pretreated metastatic male breast cancer. Further trials and large case series focused on male breast cancer and fulvestrant are more than warranted.

## funding

FZ has received a research grant from HeSMO, protocol number 1976/30-11-2010.

## disclosure

The authors have declared no conflicts of interest.

F. Zagouri<sup>1</sup>, T. N. Sergentanis<sup>2</sup>, D. Chrysikos<sup>2</sup>, E. Zografos<sup>2</sup>, M. Rudas<sup>1</sup>, G. Steger<sup>1</sup>, G. Zografos<sup>2</sup> & R. Bartsch<sup>1</sup>

<sup>1</sup>Comprehensive Cancer Center Vienna, Department of Medicine I/ Division of Oncology, Medical University of Vienna, Vienna, Austria  
<sup>2</sup>1st Propaedeutic Surgical Department, Hippocrateio Hospital, University of Athens, Athens, Greece  
(\*E-mail: florazagouri@yahoo.co.uk)

## references

1. NCCN Clinical Practice Guidelines in Oncology. Breast Cancer. Version 2.2012. Available at [www.nccn.com](http://www.nccn.com)
2. Di Leo A, Jerusalem G, Petruzella L et al. Results of the CONFIRM phase III trial comparing fulvestrant 250 mg with fulvestrant 500 mg in postmenopausal women with estrogen receptor-positive advanced breast cancer. *J Clin Oncol* 2010; 28: 4594–4600.
3. Masci G, Gandini C, Zuradelli M et al. Fulvestrant for advanced male breast cancer patients: a case series. *Ann Oncol* 2011; 22: 985.
4. de la Haba Rodríguez JR, Porras Quintela I, Pulido Cortijo G et al. Fulvestrant in advanced male breast cancer. *Ann Oncol* 2009; 20: 1896–1897.
5. Chan CM, Martin LA, Johnston SR et al. Molecular changes associated with the acquisition of oestrogen hypersensitivity in MCF-7 breast cancer cells on long-term oestrogen deprivation. *J Steroid Biochem Mol Biol* 2002; 81: 333–341.

doi: 10.1093/annonc/mds597

## Meat consumption and risk of lung cancer: evidence from observational studies

I read with great interest the recent paper by Yang et al. [1]. They carried out a meta-analysis of 34 studies to investigate the relationship between meat consumption and lung cancer risk. It is an interesting study. However, I would like to raise several concerns related to this paper.

First, the definition of total meat and white meat is not clear in the meta-analysis. The total meat includes red meat, processed meat, poultry and fish. But the total meat definition in the meta-analysis included meat defined in the individual studies as ‘all meat’ without specifying the type or ‘total meat’. Thus, all 34 studies should be eligible for the meta-analysis of total meat intake. In the meta-analysis, the white meat definition included the meat defined in the individual studies

as ‘white meat’, or poultry and fish. However, the authors did not conduct the meta-analysis of white meat intake according to their definition. The meta-analysis of white meat intake only included six studies, but not all the studies on poultry and fish intake. Given this point, their results of total meat and white meat intake were not accurate.

Second, there are some issues in the methods. A meta-analysis should include as much information as possible. But the authors only searched articles published in English, which may lead to language bias. It seems unreasonable for the authors to select eligible study from duplicated reports. In the meta-analysis, when several studies derived from the same study population, the most recent publication was included. In fact, the largest study should be included. Moreover, the authors did not carry out the meta-analysis according to their rule. For example, two studies by De Stefani et al. [2, 3] were derived from the same population, and two studies by Kubik et al. [4, 5] also derived from the same population. However, these studies were all included in the meta-analysis. Generally, in a meta-analysis, when a study reported the results on different ethnicities or countries, we treated them independently. But, in the meta-analysis, when a study reported the results on different gender, the authors also treated them independently, which will result in an increased contribution of the study in the pooled results, and may distort the meta-analysis. Additionally, there was a statistically significant heterogeneity in the meta-analysis. Although some subgroup analyses were carried out, heterogeneity still remained, indicating that the other unknown factors may also contribute to the heterogeneity. Therefore, it is meaningful for the authors to do subgroup analysis by different ethnicities.

Third, in the discussion, the authors stated that ‘Another explanation is that high poultry eaters often have a healthier overall eating pattern and lifestyle.’ Indeed, the reference cited by the authors did not support the view. Additionally, 20 studies did not report the relative risk with its 95% confidence interval or standard error, and were excluded from the meta-analysis, which may distort the results of meta-analysis.

Collectively, it is an interesting study. Although there were several limitations, the meta-analysis of large sample size still provides new information on the relationship between meat intake and lung cancer risk.

F. Wang<sup>1</sup>, G. P. Sun<sup>1,\*</sup> & Y. F. Zou<sup>2</sup>

<sup>1</sup>Department of Oncology, The First Affiliated Hospital of Anhui Medical University, Hefei

<sup>2</sup>Department of Epidemiology and Biostatistics, School of Public Health, Anhui Medical University, Hefei, China

(\*E-mail: [sunguoping@ahmu.edu.cn](mailto:sunguoping@ahmu.edu.cn))

## funding

This work was supported by grants from the National Natural Science Foundation of China (81071986, 81001283).

## disclosure

The authors have declared no conflicts of interest.
